# Supplementary material for: Inkjet Printing of Drug-Loaded Mesoporous Silica Nanoparticles—A Platform for Drug Development
Source: PubMed Central journal article supplement (PMC6150386; doi:10.3390/molecules22112020), 2017-11-21
Supplement: molecules-22-02020-s001.pdf [file molecules-22-02020-s001.pdf]

Supplementary Table S1. Ink properties.

|                      | Dynamic viscosity<br>(mPas) @ 1000 s <sup>-1</sup> ,<br>22 ± 0.5 °C | Surface tension (mN/m)<br>@ 23 ± 0.5 °C,<br>1 px = 1.0576 × 10 <sup>-5</sup> | Density (g/cm <sup>3</sup> )<br>@ 23 ± 0.5 °C |
|----------------------|---------------------------------------------------------------------|------------------------------------------------------------------------------|-----------------------------------------------|
| Ink (blank)          | 6.27                                                                | 43.73 ± 0.34<br>44.82 ± 0.16 *                                               | 1.043                                         |
| MSN 1 mg/ml          | 6.15                                                                | 44.55 ± 0.52                                                                 | 1.044                                         |
| MSN 5 mg/ml          | 6.21                                                                | 43.59 ± 0.52                                                                 | 1.044                                         |
| MSN-PEI 1 mg/ml      | x                                                                   | 45.24 ± 1.16 *                                                               | x                                             |
| MSN-PEI 5 mg/ml      | x                                                                   | 45.34 ± 0.41 *                                                               | x                                             |
| MSN-PEI-F5 1 mg/ml   | x                                                                   | 44.91 ± 0.51                                                                 | 1.043                                         |
| MSN-PEI -F15 1 mg/ml | x                                                                   | 44.55 ± 0.69                                                                 | 1.044                                         |
| MSN-PEI-F5 5 mg/ml   | x                                                                   | 44.42 ± 0.56                                                                 | 1.044                                         |
| MSN-PEI -F15 5 mg/ml | x                                                                   | 43.05 ± 0.16                                                                 | 1.043                                         |

\* 1 px = 1.0797 × 10<sup>-5</sup>

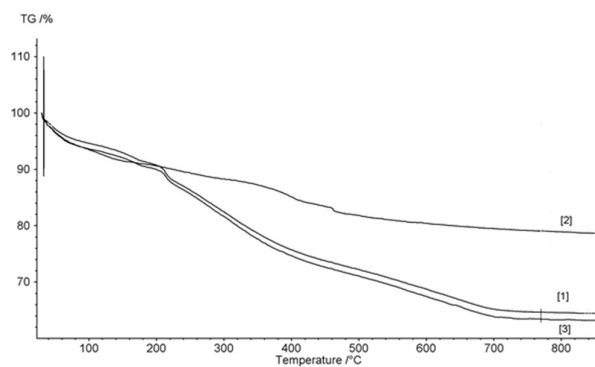

Supplementary Figure S1. TGA results of PEI surface functionalized MSNs in toluene [1] and [3] and base MSNs [2].

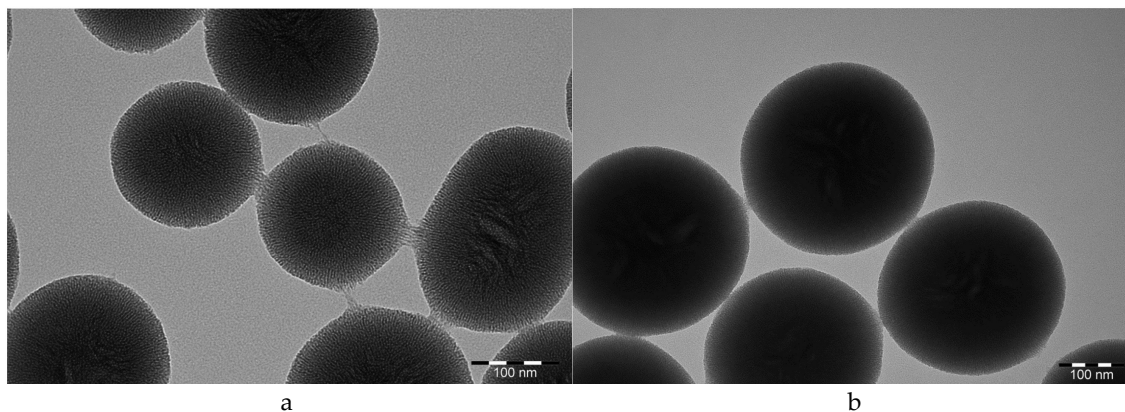

Supplementary Figure S2. TEM images of a) MSN without surface functionalization and b) MSN-PEI, scale bar 100 nm.

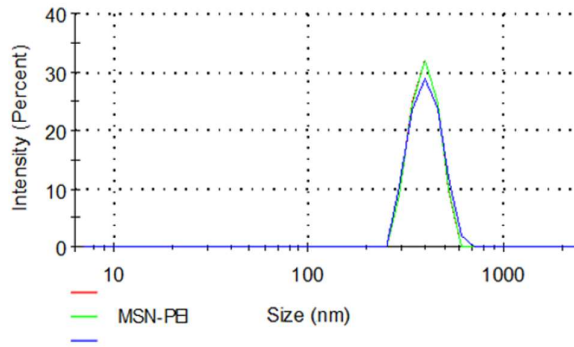

**Supplementary Figure S3.** The hydrodynamic particle size of MSN-PEI dispersed in MQ/PG (n=3) measured using DLS.

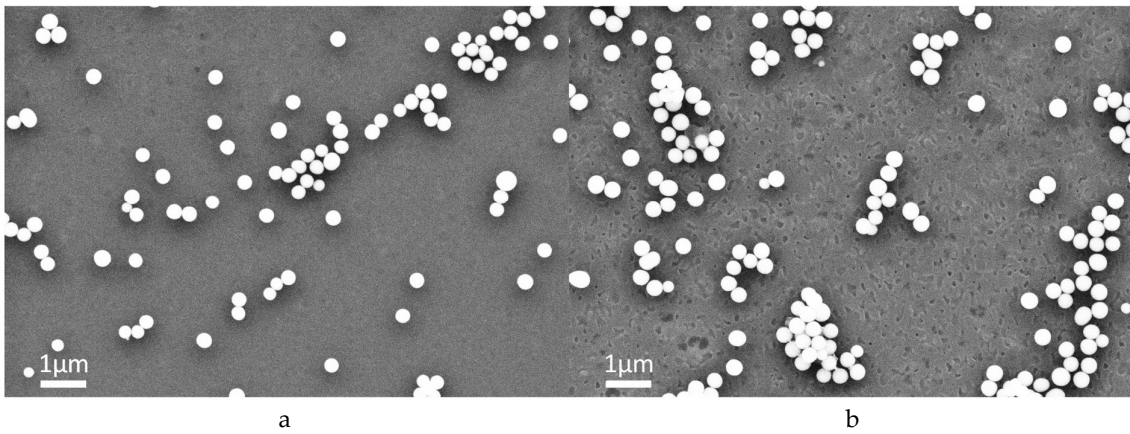

**Supplementary Figure S4.** SEM images of **a)** unloaded MSN-PEI *on the left* and **b)** drug-loaded MSN-PEI-F15 *on the right* printed on transparency film (scale bar 1  $\mu\text{m}$ ).

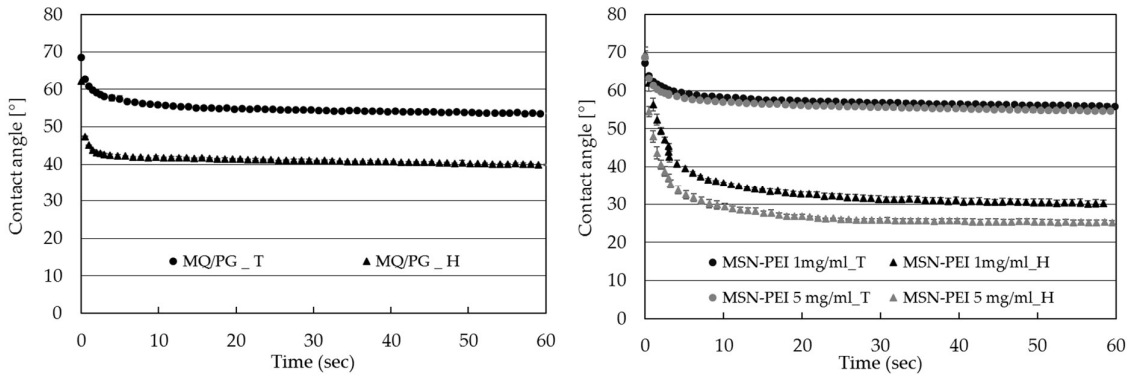

**Supplementary Figure S5.** Contact angle [ $^{\circ}$ ] versus time (sec) of MQ/PG, 1 mg/ml MSN-PEI and 5 mg/ml MSN-PEI, (n = 3) on Transparency (T) and HPMC (H) films.
